# Supplementary material for: Adaptation in protein fitness landscapes is facilitated by indirect paths
Source: eLife. 2016 Jul 8;5:e16965. doi: 10.7554/eLife.16965 (PMC4985287; doi:10.7554/eLife.16965)
Supplement: Supplementary file 2. — DOI: http://dx.doi.org/10.7554/eLife.16965.025 [file elife-16965-supp2.xlsx]

## Sheet: Supplementary Dataset 2
Variants	Imputed fitness
AAAD	0.0118565
AAAC	0.049726
AAAE	0.0114158
AAAK	0.0135077
AAAF	0.0296883
AAAW	0.0119933
AARD	0.0671294
AARC	0.0193571
AANR	0.0123105
AANN	0.0199726
AAND	0.263481
AANC	0.0298134
AANQ	0.0198405
AANE	0.0283553
AANG	0.028291
AANI	0.00729513
AANK	0.031361
AANM	0.0431395
AANF	0.0287491
AANW	0.0177344
AANY	0.0174874
AADN	0.0184189
AADD	0.280212
AADC	0.0271385
AADE	0.0275385
AADG	0.0156236
AADI	0.00947424
AADK	0.0199808
AADM	0.0167042
AADF	0.0589454
AADW	0.0222774
AADY	0.0249518
AACD	0.0585983
AACC	0.394615
AACG	1.95732
AACI	0.0874289
AACK	0.028
AACM	0.174722
AACF	0.0642061
AACW	0.0193255
AACY	0.0172321
AAQN	0.03642
AAQD	0.614182
AAQC	0.0879636
AAQQ	0.0333202
AAQE	0.111462
AAQG	0.0161202
AAQH	0.0295251
AAQI	0.0220827
AAQK	0.0667261
AAQM	0.0683096
AAQF	0.0511848
AAQW	0.0113359
AAQY	0.00699206
AAEN	0.0116172
AAED	0.238185
AAEC	0.0295563
AAEE	0.0331852
AAEG	0.0329041
AAEK	0.0422939
AAEM	0.0185259
AAEF	0.112332
AAEW	0.0056525
AAEV	0.0185608
AAVD	0.016453
AAVW	0.0126986
AAHN	0.0396786
AAHD	0.413474
AAHC	0.0336512
AAHQ	0.0249483
AAHE	0.0586368
AAHG	0.0129309
AAHH	0.0288572
AAHI	0.00955895
AAHK	0.0661093
AAHM	0.0297853
AAHF	0.130556
AAHP	0.0283319
AAHS	0.01446
AAHW	0.00812046
AAHY	0.00500877
AAHV	0.0266647
AAIN	0.0137638
AAID	0.0918738
AAIC	0.0227255
AAIE	0.0214471
AAIG	0.0359555
AAIH	0.0111013
AAII	0.0148056
AAIK	0.0195395
AAIM	0.0169532
AAIF	0.05327
AAIW	0.0206593
AAIY	0.0130778
AALD	0.0436645
AAKA	0.0220911
AAKN	0.0280094
AAKD	0.322708
AAKC	0.0341192
AAKQ	0.0162697
AAKE	0.0415413
AAKG	0.0312886
AAKH	0.015079
AAKI	0.00809413
AAKK	0.0546437
AAKM	0.0255425
AAKF	0.0274407
AAKW	0.0045625
AAKY	0.00281419
AAKV	0.0149817
AAMN	0.0363658
AAMD	0.00910812
AAMC	0.0574553
AAMQ	0.0211186
AAME	0.018539
AAMI	0.0406863
AAMK	0.0190664
AAMM	0.0267175
AAMF	0.0143642
AAMW	0.00587795
AAMY	0.0514449
AAFD	0.124158
AAFI	0.0411876
AAFF	0.0337927
AAFW	0.0451954
AAFY	0.0113719
AAPD	0.0447445
AAPE	0.0399215
AAPK	0.0168821
AAPM	0.0179475
AAPF	0.0174978
AAPW	0.00108835
AASD	0.0216905
AASC	0.0212275
AATD	0.0243236
AATC	0.0165009
AATE	0.01394
AATG	0.0204704
AATI	0.0226003
AATK	0.0171864
AATM	0.0210257
AATF	0.0168603
AATW	0.013912
AATY	0.0100399
AAWD	0.0416002
AAWC	0.0146255
AAWE	0.00978697
AAWK	0.0131735
AAWM	0.00732173
AAWW	0.0961189
AAYN	0.0252029
AAYD	0.0279089
AAYC	0.0296032
AAYQ	0.0211866
AAYI	0.0363112
AAYK	0.00963934
AAYM	0.05359
AAYF	0.0862347
AAYW	0.00536372
AAYY	0.00997458
AAGD	0.0523832
AAGW	0.0697869
ARAD	0.00941133
ARRD	0.0419715
ARND	0.158963
ARNC	0.0236944
ARDD	0.156316
ARCD	0.0492047
ARCI	0.0904215
ARCW	0.0220655
ARQN	0.0243985
ARQD	0.355944
ARQC	0.0671544
ARQQ	0.0225547
ARQE	0.0702476
ARQI	0.0157628
ARQK	0.0444593
ARQM	0.0492496
ARQF	0.0339461
ARQW	0.00893305
AREN	0.00755378
ARED	0.13398
AREK	0.0273516
AREM	0.0129641
ARVD	0.0113887
ARHD	0.240541
ARHC	0.0257886
ARHE	0.0370964
ARHG	0.0104939
ARHH	0.0231963
ARHI	0.00684928
ARHK	0.0442165
ARHM	0.0215565
ARHF	0.0869162
ARHW	0.00642364
ARID	0.0602903
ARII	0.0119668
ARLD	0.0363954
ARKN	0.0210665
ARKD	0.209971
ARKC	0.0292438
ARKE	0.0293935
ARKG	0.0283992
ARKI	0.00648656
ARKK	0.0408762
ARKM	0.0206751
ARKF	0.0204319
ARKW	0.00403657
ARKV	0.0132547
ARMD	0.00637325
ARME	0.0141072
ARMW	0.00559267
ARFD	0.0678295
ARPD	0.0283801
ARSD	0.0137576
ARTD	0.0154277
ARWN	0.0207788
ARWD	0.0263857
ARWC	0.01222
ARWF	0.00675879
ARYN	0.0184784
ARYD	0.0177017
ARYE	0.0142021
ARYI	0.0283667
ARYK	0.00702915
ARYW	0.00462594
ARYY	0.00860258
ARGD	0.033225
ANAD	0.0111537
ANRD	0.0463915
ANRE	0.0232149
ANND	0.22619
ANNK	0.0315153
ANNF	0.029216
ANDD	0.207529
ANDG	0.0140871
ANDK	0.0173226
ANDW	0.0215446
ANCN	0.0192843
ANCD	0.0524484
ANCC	0.427204
ANCQ	0.0331686
ANCE	0.0221853
ANCG	2.13284
ANCH	0.0189445
ANCI	0.111119
ANCK	0.0293369
ANCM	0.199244
ANCF	0.0680294
ANCW	0.0225871
ANCV	0.0741681
ANQA	0.0310668
ANQN	0.0383855
ANQD	0.55503
ANQC	0.0961473
ANQQ	0.0371302
ANQE	0.124471
ANQG	0.0177354
ANQH	0.0341457
ANQI	0.0283372
ANQK	0.0705868
ANQM	0.0786486
ANQF	0.0547562
ANQP	0.0125942
ANQT	0.0234499
ANQW	0.0133769
ANQY	0.00825099
ANQV	0.043925
ANEN	0.00970406
ANED	0.170592
ANEC	0.0256041
ANEQ	0.00797532
ANEK	0.0354593
ANEM	0.016905
ANEF	0.0952404
ANEW	0.00528648
ANVD	0.0131293
ANHR	0.0154673
ANHN	0.0399047
ANHD	0.35654
ANHC	0.0350974
ANHQ	0.0265277
ANHE	0.0624817
ANHG	0.0135749
ANHH	0.0318448
ANHI	0.0117045
ANHK	0.0667314
ANHM	0.0327229
ANHF	0.133269
ANHT	0.0301631
ANHW	0.00914368
ANHY	0.00563991
ANHV	0.0300246
ANID	0.0671377
ANIC	0.0200865
ANIW	0.0197138
ANLN	0.0104392
ANLD	0.0344744
ANLM	0.0186542
ANLW	0.0182067
ANKN	0.0281839
ANKD	0.278419
ANKC	0.0356042
ANKE	0.0442886
ANKG	0.0328643
ANKH	0.0166489
ANKI	0.00991616
ANKK	0.055187
ANKM	0.0280764
ANKF	0.0280257
ANKW	0.00514012
ANKY	0.00317047
ANKV	0.0168783
ANMD	0.00745555
ANMC	0.0568848
ANMI	0.0472917
ANMK	0.0182695
ANMM	0.0278636
ANFD	0.0784936
ANFQ	0.015618
ANFM	0.0255385
ANFF	0.0252904
ANFW	0.037311
ANFY	0.00938809
ANPN	0.0147737
ANPD	0.0348238
ANPC	0.0242844
ANPE	0.0383942
ANPM	0.0177963
ANPF	0.016121
ANPW	0.00110607
ANSD	0.0168813
ANTD	0.0189306
ANWN	0.0257248
ANWD	0.0323766
ANWC	0.0137677
ANWQ	0.0250536
ANWE	0.00941255
ANWH	0.0160009
ANWI	0.0209823
ANWK	0.0120018
ANWM	0.00726005
ANWF	0.00857906
ANWW	0.0976846
ANWY	0.0250107
ANYN	0.0228768
ANYD	0.0217209
ANYC	0.0278669
ANYE	0.0198023
ANYG	0.913048
ANYH	0.0173655
ANYI	0.0401293
ANYK	0.00878197
ANYM	0.0531386
ANYF	0.0794494
ANYW	0.00545109
ANYY	0.0101371
ANYV	0.0178995
ANGD	0.0407688
AVAD	0.00873239
AVRD	0.0376372
AVND	0.122621
AVNF	0.0165209
AVNW	0.0131193
AVDD	0.117351
AVCD	0.042317
AVCK	0.0244995
AVQD	0.319345
AVQC	0.0739911
AVQQ	0.0218455
AVQE	0.0716661
AVQG	0.0143546
AVQK	0.0420365
AVQM	0.0510296
AVQF	0.0328623
AVQW	0.00936908
AVQY	0.00577893
AVQV	0.0307648
AVED	0.102398
AVEW	0.00386276
AVVD	0.0100089
AVHD	0.202856
AVHC	0.0267087
AVHQ	0.0154337
AVHE	0.0355741
AVHG	0.0108649
AVHK	0.0392979
AVHF	0.0790912
AVHW	0.00633283
AVID	0.0501435
AVLD	0.0277643
AVKD	0.16629
AVKC	0.0284424
AVKE	0.0264704
AVKG	0.0276121
AVKK	0.0341164
AVKF	0.01746
AVKW	0.00373712
AVKY	0.00230509
AVMD	0.00558317
AVMK	0.0141608
AVMW	0.0057274
AVFD	0.0779299
AVPD	0.0237604
AVPW	0.00091867
AVSD	0.0115182
AVTD	0.0129164
AVTK	0.0110577
AVWD	0.0220907
AVYD	0.0148203
AVYE	0.0135206
AVYI	0.0283049
AVYM	0.0408861
AVGD	0.0278167
ACAN	0.0235171
ACAD	0.00761676
ACAC	0.0286791
ACAQ	0.023405
ACAE	0.0187903
ACAH	0.0182715
ACAI	0.0272113
ACAK	0.0233469
ACAM	0.469477
ACAF	0.0481523
ACAW	0.0172571
ACAY	0.0142529
ACAV	0.0243444
ACRN	0.0332297
ACRD	0.0654709
ACRC	0.016949
ACRQ	0.0306605
ACRE	0.0679305
ACRG	0.0463885
ACRI	0.059041
ACRK	0.0451851
ACRM	0.0332544
ACRF	0.0294122
ACRW	0.0283423
ACRY	0.0210735
ACNA	0.0238742
ACNN	0.0415264
ACND	0.208424
ACNC	0.0211728
ACNQ	0.0466598
ACNE	0.0574705
ACNG	0.0355099
ACNH	0.0298047
ACNI	0.0161017
ACNK	0.0667457
ACNM	0.0759012
ACNF	0.0574172
ACNP	0.0143739
ACNS	0.0102492
ACNW	0.0314219
ACNY	0.0309843
ACNV	0.0321137
ACDA	0.0144211
ACDN	0.0343654
ACDD	0.198908
ACDC	0.017295
ACDQ	0.0396533
ACDE	0.0500863
ACDG	0.0175974
ACDH	0.0196723
ACDI	0.0187651
ACDK	0.0381605
ACDM	0.0263735
ACDF	0.105642
ACDP	0.00890578
ACDW	0.03542
ACDY	0.0396722
ACDV	0.0349216
ACCN	0.0182525
ACCD	0.0220277
ACCC	0.133176
ACCE	0.0193193
ACCG	1.16748
ACCH	0.0184191
ACCI	0.0917024
ACCK	0.028319
ACCM	0.146086
ACCF	0.0609368
ACCW	0.0162717
ACCY	0.0145091
ACCV	0.0534307
ACQA	0.0461968
ACQR	0.0335976
ACQN	0.0940048
ACQD	0.603138
ACQC	0.0775515
ACQQ	0.097279
ACQE	0.28045
ACQG	0.0251185
ACQH	0.0858983
ACQI	0.060508
ACQL	0.0470016
ACQK	0.176299
ACQM	0.149202
ACQF	0.126905
ACQP	0.0234751
ACQS	0.0624781
ACQT	0.0437097
ACQW	0.024934
ACQY	0.0153795
ACQV	0.0818744
ACER	0.0619013
ACEN	0.022687
ACED	0.176971
ACEC	0.0197153
ACEQ	0.0199472
ACEE	0.0631746
ACEG	0.0387917
ACEH	0.0647151
ACEI	0.0478859
ACEK	0.084547
ACEM	0.0306155
ACEF	0.210721
ACEP	0.0200249
ACES	0.0163424
ACET	0.0323812
ACEW	0.00940686
ACEY	0.0219111
ACEV	0.0308888
ACVD	0.0166077
ACVK	0.019092
ACHA	0.0483658
ACHR	0.0480606
ACHN	0.106581
ACHD	0.422553
ACHC	0.0308746
ACHQ	0.0757991
ACHE	0.153537
ACHG	0.0209683
ACHH	0.0873696
ACHI	0.0272573
ACHL	0.0447473
ACHK	0.181773
ACHM	0.0677032
ACHF	0.336858
ACHP	0.0648523
ACHS	0.0330992
ACHT	0.0613177
ACHW	0.0185879
ACHY	0.0114652
ACHV	0.0610361
ACIN	0.0381007
ACID	0.0967598
ACIC	0.0214874
ACIQ	0.042317
ACIE	0.057874
ACIG	0.0600857
ACIH	0.0346378
ACII	0.043508
ACIK	0.0553671
ACIM	0.0397126
ACIF	0.141646
ACIW	0.0487344
ACIY	0.03085
ACLD	0.0290437
ACLE	0.0312543
ACLI	0.0350536
ACLK	0.0277985
ACLM	0.0274356
ACLF	0.0218632
ACKA	0.034468
ACKR	0.0335637
ACKN	0.0647759
ACKD	0.283942
ACKC	0.0269516
ACKQ	0.0425589
ACKE	0.0936507
ACKG	0.0436826
ACKH	0.0393065
ACKI	0.0198715
ACKL	0.0363356
ACKK	0.129358
ACKM	0.0499869
ACKF	0.0609583
ACKP	0.0384652
ACKS	0.0223068
ACKT	0.0296616
ACKW	0.00899165
ACKY	0.00554613
ACKV	0.0295254
ACMA	0.785478
ACMN	0.0684906
ACMD	0.00652643
ACMC	0.036961
ACMQ	0.0449887
ACME	0.0340365
ACMG	1.67362
ACMH	0.0379846
ACMI	0.0813458
ACML	0.0307405
ACMK	0.0367578
ACMM	0.0425812
ACMF	0.0259863
ACMP	0.0188955
ACMT	0.234969
ACMW	0.00943387
ACMY	0.082567
ACMV	0.0309775
ACFD	0.0891612
ACFC	0.0922115
ACFI	0.0825296
ACFK	0.0530489
ACFF	0.0612694
ACFW	0.0726967
ACFY	0.0182917
ACPR	0.0116676
ACPD	0.0344217
ACPC	0.0178171
ACPQ	0.0460535
ACPE	0.0786885
ACPG	0.0231386
ACPH	0.0350398
ACPI	0.0289925
ACPK	0.0349426
ACPM	0.0307094
ACPF	0.0339855
ACPP	0.00888739
ACPW	0.00187533
ACPY	0.0255686
ACPV	0.00615792
ACSN	0.0125062
ACSD	0.0166864
ACSI	0.0264791
ACSM	0.0257479
ACSW	0.013527
ACTR	0.0129297
ACTN	0.0309848
ACTD	0.018712
ACTC	0.0113964
ACTQ	0.0488266
ACTE	0.0274768
ACTG	0.0249874
ACTH	0.0199479
ACTI	0.0485118
ACTK	0.0355723
ACTM	0.0359764
ACTF	0.0327474
ACTW	0.0239717
ACTY	0.0172997
ACWN	0.0573049
ACWD	0.0320028
ACWC	0.0101011
ACWQ	0.0597061
ACWE	0.0192909
ACWH	0.0366141
ACWI	0.0407535
ACWK	0.0272664
ACWM	0.012528
ACWF	0.018086
ACWS	0.0082452
ACWW	0.165622
ACWY	0.0424051
ACWV	0.0224813
ACYA	0.0761649
ACYN	0.0509606
ACYD	0.0214702
ACYC	0.0204456
ACYQ	0.0484557
ACYE	0.0405847
ACYG	1.17626
ACYH	0.0397368
ACYI	0.0779425
ACYK	0.0199515
ACYM	0.0916962
ACYF	0.167492
ACYT	0.0860758
ACYW	0.00924221
ACYY	0.0171872
ACYV	0.0303482
ACGD	0.0402981
ACGW	0.12025
AQAA	0.607797
AQAD	0.0138689
AQAC	0.0322443
AQAQ	0.0107046
AQAE	0.0110935
AQAG	0.0624835
AQAH	0.00825996
AQAI	0.0116789
AQAK	0.0126897
AQAM	0.253076
AQAF	0.0225237
AQAW	0.00832059
AQAY	0.00687207
AQAV	0.0117377
AQRN	0.0108718
AQRD	0.0866685
AQRQ	0.0101949
AQRE	0.029157
AQRG	0.0204999
AQRI	0.0184224
AQRM	0.0130325
AQRF	0.0100021
AQRW	0.00993486
AQRY	0.00738693
AQNA	0.0131693
AQNR	0.0139236
AQNN	0.022158
AQND	0.449979
AQNC	0.0282253
AQNQ	0.0253033
AQNE	0.0402305
AQNG	0.025593
AQNH	0.0159757
AQNI	0.00819399
AQNL	0.00713537
AQNK	0.0430148
AQNM	0.0485128
AQNF	0.0318446
AQNP	0.00821737
AQNT	0.0100238
AQNW	0.0179635
AQNY	0.0177133
AQNV	0.018359
AQDA	0.00824671
AQDN	0.0190098
AQDD	0.44519
AQDC	0.0239017
AQDQ	0.0222926
AQDE	0.0363478
AQDG	0.0131483
AQDH	0.0109315
AQDI	0.00989973
AQDK	0.0254951
AQDM	0.0174753
AQDF	0.0607405
AQDP	0.00527811
AQDS	0.0064449
AQDW	0.0209921
AQDY	0.0235122
AQDV	0.0206967
AQCA	2.75327
AQCN	0.0133584
AQCD	0.0652287
AQCC	0.243507
AQCQ	0.0249813
AQCE	0.0185492
AQCG	1.15411
AQCH	0.0135416
AQCI	0.0640072
AQCK	0.0250321
AQCM	0.128068
AQCF	0.0463553
AQCT	0.0643927
AQCW	0.012759
AQCY	0.0113769
AQCV	0.0418961
AQQA	0.0223629
AQQR	0.0141082
AQQN	0.0440189
AQQD	1.14273
AQQC	0.0907261
AQQQ	0.0462951
AQQE	0.172285
AQQG	0.0158872
AQQH	0.0404057
AQQI	0.027022
AQQL	0.0151015
AQQK	0.0997072
AQQM	0.0836885
AQQF	0.0617669
AQQP	0.0117773
AQQS	0.0313449
AQQT	0.0219289
AQQW	0.0125093
AQQY	0.00771582
AQQV	0.041076
AQEA	0.0160036
AQER	0.0331429
AQEN	0.0135455
AQED	0.427519
AQEC	0.0294086
AQEQ	0.0121039
AQEE	0.0494838
AQEG	0.031284
AQEH	0.0388144
AQEI	0.0272673
AQEK	0.0609682
AQEM	0.0218957
AQEF	0.130772
AQES	0.010454
AQET	0.0207139
AQEW	0.00601746
AQEY	0.0140163
AQEV	0.0197592
AQVD	0.0179101
AQVC	0.00966838
AQVI	0.00838682
AQVK	0.00614597
AQVM	0.0053656
AQVW	0.00819859
AQHA	0.020211
AQHR	0.0174214
AQHN	0.0430825
AQHD	0.691097
AQHC	0.0311799
AQHQ	0.0311395
AQHE	0.0814213
AQHG	0.0114485
AQHH	0.0354773
AQHI	0.010508
AQHL	0.012411
AQHK	0.0887438
AQHM	0.0327817
AQHF	0.141532
AQHP	0.0280865
AQHS	0.0143347
AQHT	0.0265557
AQHW	0.00805012
AQHY	0.00496538
AQHV	0.0264338
AQIR	0.00382995
AQIN	0.0133426
AQID	0.1371
AQIC	0.0187994
AQIQ	0.0150608
AQIE	0.0265884
AQIG	0.0284212
AQIH	0.012185
AQII	0.0145309
AQIK	0.0234177
AQIM	0.0166585
AQIF	0.0515581
AQIT	0.00448716
AQIW	0.0182849
AQIY	0.0115747
AQIV	0.00962942
AQLN	0.00758047
AQLD	0.0449448
AQLC	0.0524662
AQLE	0.015682
AQLI	0.0127861
AQLK	0.012841
AQLM	0.0125692
AQLF	0.00869144
AQLW	0.0107811
AQLY	0.00440508
AQKA	0.0206022
AQKR	0.0174026
AQKN	0.0374528
AQKD	0.664259
AQKC	0.0389322
AQKQ	0.0250085
AQKE	0.071037
AQKG	0.0341149
AQKH	0.02283
AQKI	0.0109576
AQKL	0.0144152
AQKK	0.0903341
AQKM	0.0346201
AQKF	0.0366346
AQKP	0.0238281
AQKS	0.0138185
AQKT	0.0183745
AQKW	0.00557008
AQKY	0.00343567
AQKV	0.0182902
AQMA	0.353171
AQMR	0.00708631
AQMN	0.029789
AQMD	0.0114851
AQMC	0.0401626
AQMQ	0.0198863
AQME	0.019421
AQMG	0.98321
AQMH	0.0165959
AQMI	0.0337424
AQML	0.0091739
AQMK	0.019309
AQMM	0.0221842
AQMF	0.0117478
AQMT	0.109493
AQMW	0.00439608
AQMY	0.0384753
AQMV	0.0144352
AQFN	0.014554
AQFD	0.111202
AQFC	0.071013
AQFQ	0.0133994
AQFE	0.0160725
AQFI	0.0242619
AQFK	0.0197498
AQFM	0.0186991
AQFF	0.0196305
AQFT	0.497701
AQFW	0.0240085
AQFV	0.0952431
AQPR	0.0038426
AQPN	0.0120865
AQPD	0.0511493
AQPC	0.0163479
AQPQ	0.0171894
AQPE	0.0379127
AQPG	0.0114782
AQPH	0.0129271
AQPI	0.0101548
AQPL	0.00412182
AQPK	0.0154993
AQPM	0.0135096
AQPF	0.0129733
AQPP	0.003497
AQPT	0.0046074
AQPW	0.000737901
AQPY	0.0100607
AQPV	0.00242301
AQSN	0.004593
AQSD	0.0247953
AQSC	0.0134518
AQSE	0.00832693
AQSG	0.00858417
AQSM	0.011327
AQSF	0.00485234
AQSW	0.0053226
AQSY	0.00443602
AQTA	0.00515238
AQTN	0.0113794
AQTD	0.0278053
AQTC	0.0104566
AQTQ	0.0182244
AQTE	0.0132385
AQTG	0.0123953
AQTH	0.0073593
AQTI	0.0169916
AQTL	0.00335522
AQTK	0.0157787
AQTM	0.0158267
AQTF	0.0125007
AQTS	0.0024775
AQTW	0.00943234
AQTY	0.00680706
AQWA	0.00535844
AQWR	0.00525575
AQWN	0.0210457
AQWD	0.0475549
AQWC	0.00926816
AQWQ	0.0222852
AQWE	0.00929449
AQWG	0.0511241
AQWH	0.0135079
AQWI	0.0142742
AQWK	0.0120944
AQWM	0.00551128
AQWF	0.00690398
AQWS	0.00324431
AQWT	0.00398855
AQWW	0.0651689
AQWY	0.0166855
AQYA	0.0289169
AQYN	0.0187157
AQYD	0.0319038
AQYC	0.0187595
AQYQ	0.018086
AQYE	0.019554
AQYG	0.583497
AQYH	0.01466
AQYI	0.0272999
AQYL	0.00432341
AQYK	0.00884978
AQYM	0.0403388
AQYF	0.0639368
AQYP	0.0116198
AQYS	0.00821598
AQYT	0.033869
AQYW	0.00363661
AQYY	0.00676279
AQYV	0.0119414
AQGN	0.0682184
AQGD	0.0598814
AQGC	0.555425
AQGE	0.0279821
AQGM	0.827319
AQGF	0.831876
AQGW	0.0473157
AEAN	0.00801049
AEAD	0.00895786
AEAC	0.021835
AEAE	0.00850465
AEAI	0.00782862
AEAK	0.00921093
AEAM	0.17244
AEAF	0.0164807
AEAW	0.00600918
AEAY	0.00496306
AERD	0.0731989
AERC	0.0122674
AERQ	0.0103278
AERE	0.0292288
AERK	0.016947
AERM	0.0116117
AERF	0.00956988
AERW	0.0093822
AENA	0.00886078
AENR	0.0123924
AENN	0.0169865
AEND	0.294365
AENC	0.0193585
AENQ	0.0198543
AENE	0.0312373
AENG	0.0154259
AENH	0.0132367
AENI	0.00556304
AENK	0.031623
AENM	0.0334794
AENF	0.0235995
AENS	0.0042859
AENT	0.00733205
AENW	0.0131396
AENY	0.0129567
AENV	0.0134289
AEDA	0.00729891
AEDR	0.0142027
AEDN	0.0191698
AEDD	0.383097
AEDC	0.0215641
AEDE	0.0371248
AEDG	0.0104248
AEDH	0.0119143
AEDI	0.00884115
AEDK	0.0246553
AEDM	0.0158641
AEDF	0.0592126
AEDT	0.00599854
AEDW	0.0201984
AEDY	0.0226233
AEDV	0.0199142
AECN	0.00974743
AECD	0.0406159
AECC	0.158967
AECE	0.013709
AECG	0.662123
AECH	0.0106795
AECI	0.0413627
AECK	0.0175164
AECM	0.0841248
AECF	0.0326986
AECP	0.00822653
AECT	0.0448325
AECW	0.00888328
AECY	0.007921
AECV	0.0291696
AEQA	0.0190933
AEQR	0.0159338
AEQN	0.042821
AEQD	0.948599
AEQC	0.0789607
AEQQ	0.0460955
AEQE	0.169751
AEQG	0.0121513
AEQH	0.0424823
AEQI	0.0232798
AEQK	0.093016
AEQM	0.0732879
AEQF	0.0580856
AEQP	0.0109317
AEQS	0.0290942
AEQT	0.0203543
AEQW	0.011611
AEQY	0.00716178
AEQV	0.0381265
AEEA	0.0137186
AEER	0.037582
AEEN	0.0132298
AEED	0.356316
AEEC	0.0256977
AEEQ	0.0121001
AEEE	0.0489515
AEEG	0.0240235
AEEH	0.0409729
AEEI	0.0235854
AEEK	0.057105
AEEM	0.0192516
AEEF	0.123471
AEET	0.0193037
AEEW	0.00560779
AEEY	0.0130621
AEEV	0.018414
AEVD	0.0166128
AEVC	0.00940239
AEVM	0.00525038
AEVW	0.00850324
AEHA	0.0179111
AEHR	0.0204228
AEHN	0.0435012
AEHD	0.595472
AEHC	0.0281667
AEHQ	0.0321824
AEHE	0.0832691
AEHG	0.00908878
AEHH	0.0387166
AEHI	0.00939647
AEHL	0.0128365
AEHK	0.0859313
AEHM	0.0297975
AEHF	0.13815
AEHP	0.0270594
AEHS	0.0138105
AEHT	0.0255846
AEHW	0.00775575
AEHY	0.00478381
AEHV	0.0254671
AEIN	0.0136528
AEID	0.119713
AEIC	0.0172102
AEIQ	0.0157737
AEIE	0.0275562
AEIG	0.0228655
AEIH	0.0134758
AEII	0.0131679
AEIK	0.0229795
AEIM	0.0153449
AEIF	0.0510004
AEIS	0.00651067
AEIW	0.0178523
AEIY	0.0113009
AELN	0.00628258
AELD	0.0317866
AELC	0.038903
AELI	0.00938484
AELK	0.010206
AELM	0.00937773
AELF	0.00696352
AELW	0.00852565
AEKA	0.016811
AEKR	0.018784
AEKN	0.0348199
AEKD	0.526991
AEKC	0.0323827
AEKQ	0.0237978
AEKE	0.066892
AEKG	0.024937
AEKH	0.0229401
AEKI	0.00902204
AEKL	0.013728
AEKK	0.0805394
AEKM	0.0289748
AEKF	0.0329253
AEKP	0.0211375
AEKS	0.0122581
AEKT	0.0162998
AEKW	0.00494113
AEKY	0.00304773
AEKV	0.0162249
AEMA	0.227727
AEMR	0.00604428
AEMN	0.0218851
AEMD	0.00720032
AEMC	0.0263982
AEMQ	0.0149539
AEME	0.0144514
AEMG	0.567932
AEMH	0.0131777
AEMI	0.021954
AEMK	0.013604
AEMM	0.0146718
AEMF	0.00834343
AEMS	0.0284526
AEMT	0.0767538
AEMW	0.00308162
AEMY	0.0269709
AEMV	0.010119
AEFN	0.0129917
AEFD	0.0847064
AEFC	0.0567127
AEFQ	0.0122426
AEFE	0.0145315
AEFG	1.17416
AEFH	0.00865495
AEFI	0.0191801
AEFK	0.0169067
AEFM	0.0150263
AEFF	0.0169398
AEFW	0.0204488
AEFY	0.00514527
AEPA	0.00699643
AEPN	0.010948
AEPD	0.0395363
AEPC	0.0132482
AEPQ	0.0159368
AEPE	0.0347828
AEPG	0.00817454
AEPH	0.0126556
AEPI	0.00814613
AEPK	0.0134636
AEPM	0.011016
AEPF	0.0113601
AEPW	0.000637755
AEPY	0.00869529
AEPV	0.00209416
AESN	0.00416036
AESD	0.0191658
AESC	0.0109013
AESI	0.00743994
AESK	0.00720127
AESM	0.00923628
AESW	0.00460023
AETN	0.0103075
AETD	0.0214924
AETC	0.00847394
AETQ	0.0168964
AETE	0.0121456
AETI	0.0136305
AETL	0.00311312
AETK	0.0137062
AETM	0.0129054
AETF	0.0109462
AETW	0.0081522
AETY	0.00588322
AEWA	0.00426
AEWN	0.0190632
AEWD	0.036758
AEWC	0.00751085
AEWE	0.00852719
AEWG	0.0364097
AEWH	0.0132242
AEWI	0.0114507
AEWK	0.0105059
AEWM	0.00449402
AEWF	0.00604546
AEWW	0.0563243
AEWY	0.014421
AEWV	0.00764537
AEYA	0.0229891
AEYR	0.004609
AEYN	0.0169527
AEYD	0.0246603
AEYC	0.0152026
AEYQ	0.0167681
AEYE	0.0179397
AEYG	0.415556
AEYH	0.0143521
AEYI	0.0218998
AEYL	0.00401145
AEYK	0.00768741
AEYM	0.0328932
AEYF	0.0559861
AEYS	0.00710093
AEYT	0.0292724
AEYW	0.00314306
AEYY	0.00584496
AEYV	0.0103207
AEGD	0.0462859
AEGC	0.450112
AEGE	0.0256721
AEGG	0.0210099
AEGK	0.0153933
AEGM	0.674615
AEGW	0.0408941
AGAD	0.00544915
AGAI	0.00612587
AGAM	0.10014
AGRD	0.0653377
AGNN	0.0138786
AGND	0.207239
AGNC	0.0176788
AGNQ	0.0168064
AGNE	0.0244941
AGNG	0.00916489
AGNH	0.011332
AGNI	0.00503796
AGNK	0.0282484
AGNM	0.0225013
AGNF	0.0189376
AGNW	0.0112513
AGNY	0.0110947
AGDN	0.0192331
AGDD	0.331193
AGDC	0.0241824
AGDQ	0.0239176
AGDE	0.035747
AGDG	0.00760559
AGDI	0.00983194
AGDK	0.0270452
AGDM	0.0130928
AGDF	0.0583477
AGDW	0.0212386
AGCN	0.00828474
AGCD	0.0297458
AGCC	0.15102
AGCQ	0.0164294
AGCE	0.0111825
AGCH	0.00951096
AGCI	0.038967
AGCK	0.0162773
AGCM	0.0588167
AGCF	0.0272959
AGCW	0.00791298
AGCY	0.00705581
AGCV	0.0259835
AGQD	0.885211
AGQC	0.0955811
AGQQ	0.05172
AGQE	0.176433
AGQG	0.00956927
AGQH	0.0482075
AGQI	0.0279449
AGQK	0.110136
AGQM	0.0652893
AGQF	0.0617831
AGQW	0.0131787
AGQY	0.00812872
AGQV	0.0432741
AGEN	0.0150745
AGED	0.349839
AGEC	0.0327283
AGEG	0.019905
AGEI	0.0297875
AGEK	0.0711399
AGEM	0.0180445
AGEF	0.138177
AGEW	0.00669671
AGVD	0.0131059
AGVW	0.00815915
AGHN	0.0359645
AGHD	0.424206
AGHC	0.0260284
AGHE	0.0660697
AGHG	0.00546403
AGHH	0.0335394
AGHI	0.0086107
AGHK	0.0776735
AGHM	0.0202647
AGHF	0.112177
AGHW	0.0067201
AGHY	0.00414501
AGHV	0.0220664
AGID	0.0908499
AGIC	0.016942
AGIQ	0.0143931
AGIE	0.023292
AGIG	0.0146439
AGIK	0.0221274
AGIM	0.0111172
AGIF	0.0441158
AGIW	0.0164784
AGLD	0.0167276
AGKA	0.010596
AGKN	0.0279124
AGKD	0.36401
AGKC	0.0290149
AGKE	0.0514622
AGKG	0.0145361
AGKH	0.0192686
AGKI	0.0080163
AGKL	0.0194331
AGKK	0.0705872
AGKM	0.0191063
AGKF	0.0259226
AGKT	0.013694
AGKW	0.0041512
AGKY	0.0025605
AGKV	0.0136311
AGMN	0.0131264
AGMD	0.00372128
AGMC	0.0176975
AGMQ	0.00929244
AGMI	0.0145953
AGMK	0.008921
AGMM	0.00723886
AGMF	0.00491499
AGMW	0.00193712
AGMY	0.016954
AGFN	0.00906332
AGFD	0.0509191
AGFC	0.0442223
AGFE	0.00972925
AGFI	0.0148311
AGFM	0.00862307
AGFF	0.0116067
AGFW	0.014951
AGFY	0.00376191
AGPN	0.00802867
AGPD	0.0249832
AGPE	0.0244805
AGPM	0.00664543
AGSD	0.0121109
AGTN	0.00755899
AGTD	0.0135811
AGTE	0.00854822
AGTK	0.0109894
AGTM	0.0077852
AGTW	0.00626561
AGTY	0.00452172
AGWN	0.01398
AGWD	0.0232276
AGWC	0.00615656
AGWE	0.00600152
AGWK	0.00842348
AGWM	0.00271102
AGWF	0.0043543
AGWW	0.0432897
AGYN	0.0124322
AGYD	0.015583
AGYC	0.0124614
AGYE	0.0126261
AGYG	0.221602
AGYH	0.0110283
AGYI	0.0178012
AGYK	0.00616366
AGYM	0.0198428
AGYF	0.0403246
AGYW	0.00241569
AGYY	0.00449231
AGGD	0.0292483
AHAN	0.0258837
AHAD	0.0245784
AHAC	0.0854776
AHAE	0.0227622
AHAG	0.206674
AHAK	0.0244775
AHAM	0.64029
AHAF	0.0612101
AHAY	0.0181179
AHRD	0.118267
AHRC	0.028279
AHRE	0.0460658
AHRI	0.0407253
AHRF	0.0209298
AHRW	0.0201685
AHRY	0.014996
AHNA	0.0345167
AHNR	0.0183694
AHNN	0.037313
AHND	0.549068
AHNC	0.0515181
AHNQ	0.0398934
AHNE	0.0568356
AHNG	0.0582859
AHNH	0.0255466
AHNI	0.0161974
AHNK	0.0571289
AHNM	0.0845093
AHNF	0.0595856
AHNS	0.0106363
AHNW	0.0326086
AHNY	0.0321545
AHNV	0.0333265
AHDN	0.0250633
AHDD	0.425313
AHDC	0.0341571
AHDQ	0.027518
AHDE	0.0402044
AHDG	0.0234446
AHDH	0.0136862
AHDI	0.0153215
AHDK	0.0265109
AHDM	0.0238343
AHDF	0.0889843
AHDW	0.0298351
AHDY	0.0334168
AHDV	0.0294153
AHCA	9.91309
AHCR	0.0216954
AHCN	0.0309014
AHCD	0.109337
AHCC	0.610558
AHCQ	0.0541045
AHCE	0.0359985
AHCG	3.61063
AHCH	0.0297465
AHCI	0.173809
AHCL	0.054455
AHCK	0.0456699
AHCM	0.306466
AHCF	0.119151
AHCP	0.0294643
AHCS	0.116331
AHCW	0.0318165
AHCY	0.02837
AHCV	0.104474
AHQA	0.0614196
AHQR	0.0195041
AHQN	0.0776751
AHQD	1.46113
AHQC	0.173527
AHQQ	0.0764843
AHQE	0.255051
AHQG	0.0379143
AHQH	0.0677062
AHQI	0.0559731
AHQL	0.029294
AHQK	0.138764
AHQM	0.152766
AHQF	0.121108
AHQP	0.0224028
AHQS	0.0596242
AHQT	0.0417131
AHQW	0.0237951
AHQY	0.014677
AHQV	0.0781346
AHEN	0.018713
AHED	0.427965
AHEC	0.0440368
AHEQ	0.0156556
AHEE	0.0573519
AHEG	0.0584498
AHEH	0.0509195
AHEI	0.044219
AHEK	0.0664295
AHEM	0.0312915
AHEF	0.200742
AHEW	0.00896137
AHEY	0.0208734
AHVD	0.0294376
AHVK	0.0109951
AHVF	0.0182863
AHHA	0.0644725
AHHR	0.0279736
AHHN	0.0882981
AHHD	1.02635
AHHC	0.0692657
AHHQ	0.0597528
AHHE	0.139999
AHHG	0.0317331
AHHH	0.0690469
AHHI	0.0252808
AHHL	0.0279622
AHHK	0.143449
AHHM	0.0695025
AHHF	0.322316
AHHP	0.0620527
AHHS	0.0316703
AHHT	0.0586706
AHHW	0.0177855
AHHY	0.0109702
AHHV	0.0584013
AHIR	0.00488581
AHIN	0.0217254
AHID	0.16176
AHIC	0.0331791
AHIQ	0.02296
AHIE	0.036321
AHIG	0.062587
AHIH	0.0188407
AHII	0.0277741
AHIK	0.0300734
AHIM	0.0280597
AHIF	0.0932829
AHIW	0.0320947
AHIY	0.0203167
AHIV	0.0169021
AHLN	0.0158183
AHLD	0.067959
AHLC	0.118668
AHLE	0.0274538
AHLG	4.51934
AHLI	0.03132
AHLM	0.0271324
AHLF	0.0201526
AHLW	0.0242516
AHLY	0.00990901
AHKA	0.0464717
AHKR	0.019759
AHKN	0.0542778
AHKD	0.697556
AHKC	0.061156
AHKQ	0.0339329
AHKE	0.0863691
AHKG	0.0668644
AHKH	0.0314185
AHKI	0.0186412
AHKL	0.0229654
AHKK	0.103252
AHKM	0.0519021
AHKF	0.0589936
AHKP	0.0372254
AHKS	0.0215879
AHKT	0.0287056
AHKW	0.00870185
AHKY	0.00536738
AHKV	0.0285738
AHMA	1.35134
AHMN	0.0732312
AHMD	0.0204589
AHMC	0.107018
AHMQ	0.0457711
AHME	0.0400543
AHMG	3.26889
AHMH	0.0387423
AHMI	0.0973724
AHML	0.0247919
AHMK	0.0374378
AHMF	0.0320903
AHMW	0.0116498
AHMY	0.101961
AHMV	0.0382539
AHFN	0.0477312
AHFD	0.264263
AHFC	0.252435
AHFE	0.0442221
AHFH	0.0279382
AHFI	0.0934037
AHFK	0.0510848
AHFM	0.0634395
AHFF	0.0715362
AHFW	0.0848784
AHFY	0.0213568
AHPA	0.0358474
AHPR	0.00787871
AHPN	0.0316311
AHPD	0.0969972
AHPC	0.0463734
AHPQ	0.0421183
AHPE	0.0832407
AHPG	0.0406256
AHPH	0.0321262
AHPI	0.0311966
AHPL	0.0118582
AHPK	0.0319917
AHPM	0.0365743
AHPF	0.0377262
AHPW	0.00208174
AHPY	0.0283829
AHPV	0.0068357
AHSN	0.0120202
AHSD	0.0470207
AHSC	0.0381583
AHSE	0.0182825
AHSI	0.0284921
AHSK	0.0171114
AHSW	0.0150159
AHTN	0.0297807
AHTD	0.0527288
AHTC	0.0296618
AHTQ	0.0446544
AHTE	0.0290664
AHTG	0.0438717
AHTH	0.0182892
AHTI	0.0521998
AHTK	0.0325682
AHTM	0.0428473
AHTF	0.0363519
AHTW	0.0266102
AHTY	0.0192038
AHTV	0.00637517
AHWR	0.0107762
AHWN	0.0550779
AHWD	0.090181
AHWC	0.0262907
AHWQ	0.0546043
AHWE	0.0204069
AHWG	0.180948
AHWH	0.0335696
AHWI	0.0438517
AHWL	0.0229443
AHWK	0.0249638
AHWM	0.0149206
AHWF	0.0200766
AHWT	0.0112523
AHWW	0.183852
AHWY	0.0470725
AHWV	0.0249557
AHYA	0.117789
AHYR	0.00898608
AHYN	0.0489802
AHYD	0.0605009
AHYC	0.0532145
AHYQ	0.0443152
AHYE	0.0429325
AHYG	2.06522
AHYH	0.0364327
AHYI	0.0838677
AHYL	0.0124382
AHYK	0.0182666
AHYM	0.109209
AHYF	0.185927
AHYP	0.0327814
AHYS	0.0231786
AHYT	0.0955499
AHYW	0.0102595
AHYY	0.0190789
AHYV	0.0336885
AHGD	0.113556
AHGC	1.57555
AHGW	0.133485
AIAD	0.0124181
AIRD	0.0519632
AIND	0.180939
AINW	0.0146613
AIDD	0.160411
AIDK	0.0120888
AIDW	0.0153528
AICD	0.0620882
AICE	0.0247857
AICI	0.113292
AICM	0.242448
AICF	0.0923157
AICW	0.0246507
AICY	0.0219805
AIQN	0.0305923
AIQD	0.477123
AIQC	0.0867341
AIQQ	0.0282747
AIQE	0.100981
AIQG	0.0158306
AIQH	0.0275694
AIQI	0.02098
AIQK	0.0547834
AIQM	0.0694961
AIQF	0.0539571
AIQT	0.0185843
AIQW	0.0106014
AIQY	0.00653901
AIQV	0.0348111
AIED	0.146985
AIEE	0.0238828
AIEG	0.0256685
AIEK	0.0275839
AIEW	0.00419926
AIVD	0.0133863
AIHN	0.0315378
AIHD	0.303938
AIHC	0.0313972
AIHQ	0.0200324
AIHE	0.0502677
AIHG	0.0120159
AIHH	0.0254972
AIHI	0.00859343
AIHK	0.0513592
AIHM	0.0286737
AIHF	0.130229
AIHW	0.00718605
AIHY	0.00443242
AIID	0.073514
AILD	0.0402607
AILW	0.0196024
AIKD	0.25673
AIKC	0.0344524
AIKQ	0.0141385
AIKE	0.0385417
AIKG	0.0314663
AIKI	0.00787513
AIKK	0.0459437
AIKM	0.0266119
AIKW	0.00436962
AIMD	0.00816339
AIMW	0.00634223
AIFD	0.0928109
AIPD	0.0340661
AIPE	0.0354465
AIPM	0.017895
AIPW	0.000997524
AISD	0.016514
AITD	0.0185187
AIWN	0.0233308
AIWD	0.0316722
AIWC	0.0141334
AIWQ	0.0217107
AIWE	0.00868989
AIWG	0.0812588
AIWH	0.0147017
AIWI	0.0176781
AIWK	0.0105999
AIWM	0.00730033
AIWF	0.00962029
AIWW	0.0880979
AIWY	0.0225561
AIYD	0.0212483
AIYE	0.018282
AIYW	0.00491612
AIGD	0.0398818
ALAD	0.00296855
ALRD	0.0235562
ALND	0.0678016
ALDD	0.0853277
ALCD	0.0180794
ALQD	0.179485
ALED	0.073634
ALVD	0.00561036
ALHD	0.117929
ALID	0.0351866
ALLD	0.0123249
ALKD	0.107959
ALMD	0.00228734
ALFD	0.0302886
ALPD	0.0111174
ALSD	0.00538931
ALTD	0.00604354
ALWD	0.0103361
ALYD	0.00693435
ALGD	0.0130153
AKAD	0.00891517
AKRD	0.0453499
AKNN	0.0179204
AKND	0.199178
AKNC	0.0272624
AKNE	0.0253874
AKNG	0.0235613
AKNK	0.0330173
AKDD	0.182875
AKDC	0.0214247
AKDK	0.018161
AKCD	0.0426175
AKCE	0.0172778
AKCI	0.0769754
AKCK	0.028361
AKCF	0.06336
AKCW	0.0169188
AKCY	0.0150861
AKQN	0.0320701
AKQD	0.455654
AKQC	0.0789409
AKQQ	0.0316159
AKQE	0.0979388
AKQG	0.0131756
AKQH	0.0313247
AKQK	0.0689436
AKQM	0.0613617
AKQF	0.0515246
AKQW	0.0101234
AKQY	0.00624422
AKQV	0.0332418
AKED	0.176365
AKEC	0.0264734
AKEQ	0.00855189
AKEE	0.0291028
AKEG	0.0268416
AKEI	0.0207049
AKEK	0.043615
AKEF	0.11286
AKEW	0.00503819
AKEV	0.0165436
AKVD	0.0111072
AKHA	0.0217403
AKHN	0.0339646
AKHD	0.298192
AKHC	0.0293568
AKHE	0.0500852
AKHG	0.0102739
AKHH	0.0297618
AKHI	0.00834548
AKHK	0.0664003
AKHM	0.0260092
AKHF	0.127756
AKHW	0.00704958
AKHY	0.00434824
AKHV	0.0231483
AKID	0.0687225
AKIW	0.0186019
AKLD	0.0324047
AKLM	0.0166638
AKLW	0.015776
AKKA	0.0213859
AKKN	0.0284933
AKKD	0.276584
AKKC	0.0353733
AKKQ	0.0178343
AKKE	0.0421686
AKKH	0.0184819
AKKI	0.0083981
AKKK	0.0652254
AKKM	0.0265068
AKKF	0.0319116
AKKW	0.00470712
AKKY	0.00290339
AKKV	0.0154565
AKMD	0.00582655
AKME	0.0140463
AKMK	0.0169868
AKMM	0.0206946
AKFD	0.0774454
AKFI	0.0311016
AKFM	0.0239466
AKFF	0.028601
AKPD	0.0284262
AKPM	0.0138058
AKPW	0.000832302
AKSD	0.01378
AKTD	0.0154528
AKTY	0.0076779
AKWN	0.0213703
AKWD	0.0264286
AKWC	0.0112396
AKWQ	0.0212116
AKWE	0.00736409
AKWG	0.0590927
AKWH	0.0145955
AKWI	0.0146017
AKWK	0.0116557
AKWM	0.0056321
AKWF	0.00802686
AKWW	0.073506
AKWY	0.0188201
AKYD	0.0177305
AKYC	0.0227498
AKYE	0.0154927
AKYI	0.0279263
AKYK	0.00852877
AKYM	0.0412231
AKYF	0.0743356
AKYW	0.00410185
AKYY	0.00762797
AKYV	0.013469
AKGD	0.0332791
AMAD	0.0049628
AMRD	0.034472
AMND	0.112622
AMDD	0.133605
AMDK	0.0127368
AMCD	0.0263792
AMQA	0.0109185
AMQN	0.0231743
AMQD	0.353877
AMQC	0.0555633
AMQQ	0.0268183
AMQE	0.0856101
AMQG	0.00706982
AMQH	0.0246562
AMQI	0.01434
AMQK	0.0513999
AMQM	0.0430202
AMQF	0.0372015
AMQW	0.00730925
AMED	0.139566
AMEC	0.0189865
AMEK	0.0331325
AMEM	0.0118654
AMEF	0.0830296
AMEY	0.00863353
AMVD	0.00779774
AMHD	0.211223
AMHC	0.0188462
AMHQ	0.0178033
AMHE	0.0399308
AMHI	0.00550358
AMHM	0.0166315
AMHF	0.0841304
AMHW	0.00464233
AMHY	0.00286343
AMID	0.0487247
AMLD	0.0166615
AMKD	0.175953
AMKC	0.0203945
AMKQ	0.0123918
AMKE	0.0301933
AMKK	0.0398325
AMKM	0.0152225
AMKW	0.00278389
AMMD	0.00337694
AMFD	0.0482129
AMPD	0.0176965
AMSD	0.0085786
AMTD	0.00962
AMWD	0.0164529
AMWK	0.00696561
AMWW	0.0425421
AMYD	0.011038
AMYM	0.0231669
AMGD	0.0207176
AFAD	0.0131865
AFRD	0.0686151
AFND	0.189617
AFDD	0.275584
AFCD	0.0672758
AFCC	0.235654
AFQR	0.0123689
AFQN	0.0422884
AFQD	0.780771
AFQC	0.0581644
AFQQ	0.0398134
AFQE	0.121149
AFQG	0.00992434
AFQH	0.0374359
AFQI	0.0243154
AFQL	0.0179122
AFQK	0.0734439
AFQM	0.0697025
AFQF	0.0492477
AFQT	0.0169623
AFQW	0.00967606
AFQY	0.00596828
AFQV	0.0317728
AFED	0.238169
AFEC	0.0153726
AFEF	0.0850144
AFVD	0.0190842
AFHN	0.0371957
AFHD	0.424355
AFHC	0.0179643
AFHE	0.0514539
AFHH	0.0295396
AFHI	0.00849755
AFHK	0.0587457
AFHM	0.0245371
AFHW	0.00559601
AFHY	0.00345167
AFID	0.102048
AFLD	0.0355088
AFKN	0.0257985
AFKD	0.325422
AFKC	0.0178963
AFKK	0.04771
AFKM	0.0206747
AFKW	0.00308928
AFKY	0.00190549
AFMD	0.00894814
[truncated: 8,640 more rows]
